# Supplementary material for: Long noncoding RNA SNHG12 is a potential diagnostic and prognostic biomarker in various tumors
Source: Research Square preprint supplement (doi:10.21203/rs.3.rs-71554/v2), 2020-12-30
Supplement: Supplementary file 1 [file c501f55d331e300c80a781d7.docx]

**Supplementary Table S4: the Egger’s test of different subgroup**


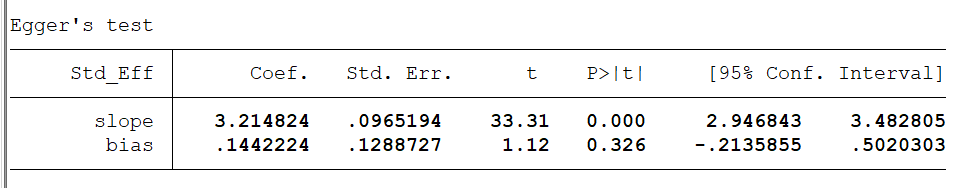
**1.Sample size ≥60**


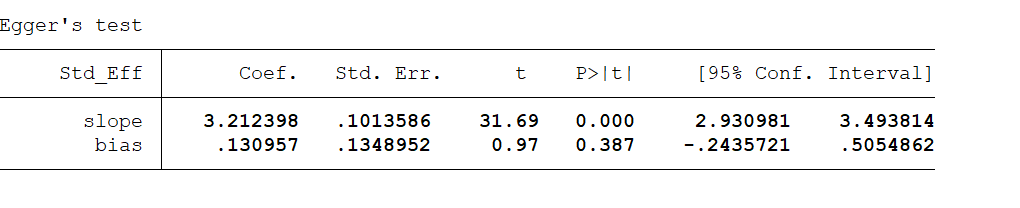
**2.Quality scores ≥80**

**3.median group**


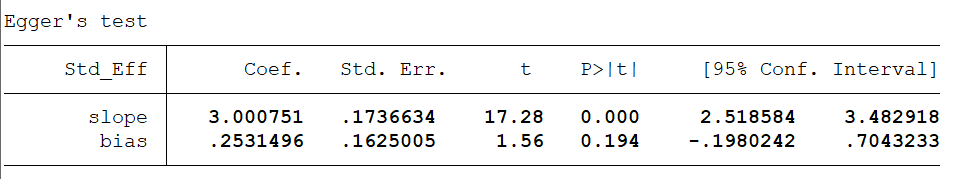


**Supplementary Table S5: the Egger’s test of different subgroup**

**1. tumor stage subgroup**


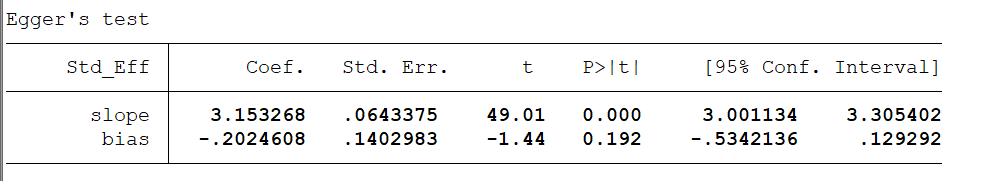


**2. distant metastasis subgroup**


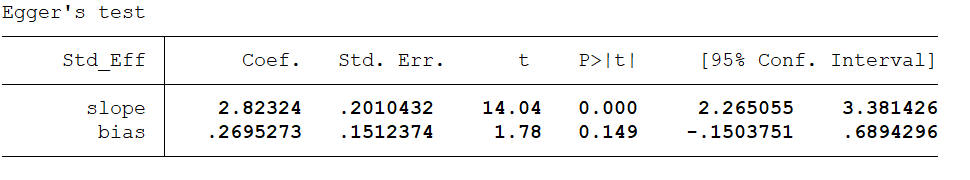


**3. Lymphatic metastasis subgroup**


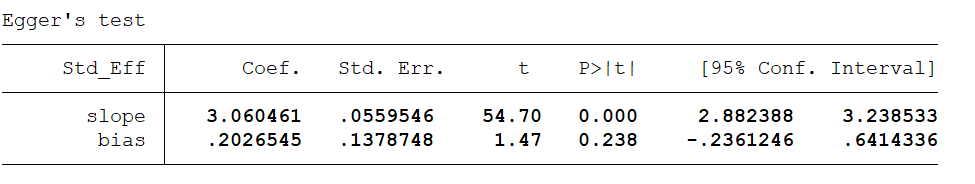


**4.** **tumor size subgroup**

**Supplementary Figure1：Sensitivity analysis of the effect of the individual subgroup on the pooled ORs.**


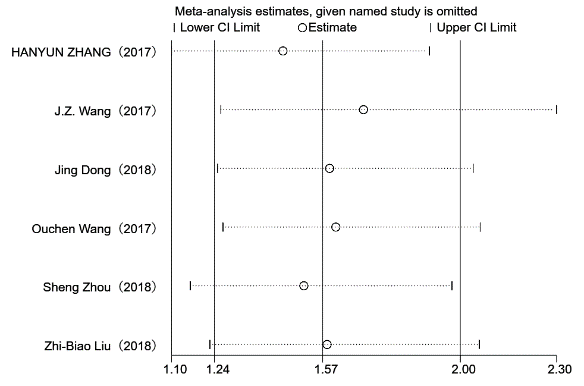

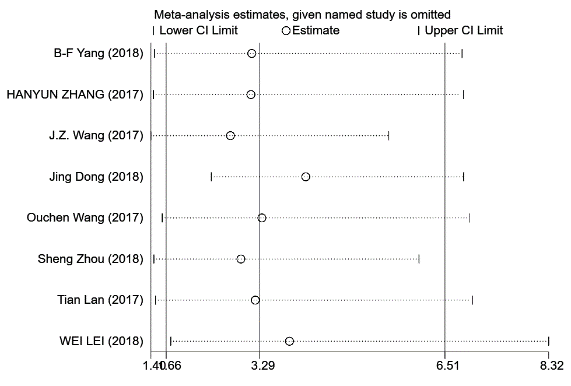
**A B**


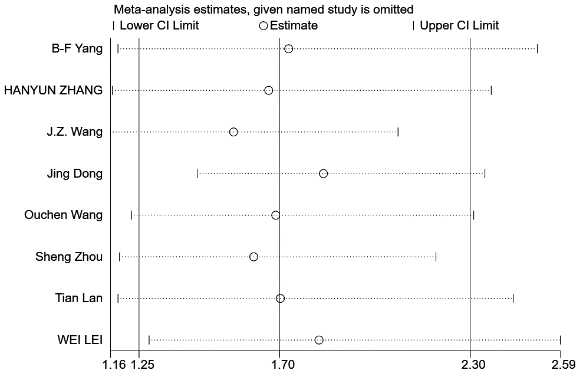

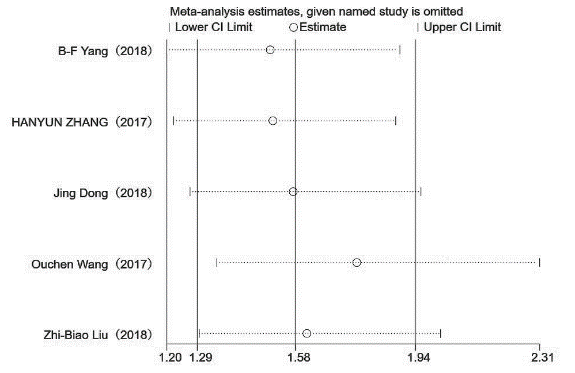


**C D**

**A：Sensitivity analysis of tumor stage subgroup. B：Sensitivity analysis of distant metastasis subgroup.**

**C：Sensitivity analysis of Lymphatic metastasis subgroup. D：Sensitivity analysis of tumor size subgroup.**
